# Supplementary material for: Correlates of decisional dynamics in the dorsal anterior cingulate cortex
Source: PLoS Biol. 2017 Nov 15;15(11):e2003091. doi: 10.1371/journal.pbio.2003091 (PMC5706721; doi:10.1371/journal.pbio.2003091)
Supplement: S3 Table — (XLSX) [file pbio.2003091.s008.xlsx]

## Sheet: Sheet1
	VARIABLE	EPOCH	FRACTION POSITIVELY MODULATED	P-VALUE (two-sided binomial test)	POPULATION T-STAT (one-sample t-test)	P-VALUE
	Offer 1 subjective value	Epoch 1	20/38	0.87	0.15	0.88
		Epoch 2	14/29	1	-1.2	0.23
	Offer 2 subjective value	Epoch 2	13/25	1	0.97	0.36
